# Supplementary material for: Selecting causal risk factors from high-throughput experiments using multivariable Mendelian randomization
Source: bioRxiv or medRxiv preprint supplement (doi:10.1101/396333), 2019-05-20
Supplement: Supplementary file [file 396333-1.pdf]

## List of Figures

|    |                                                                                                                                                                                                                                                              |    |
|----|--------------------------------------------------------------------------------------------------------------------------------------------------------------------------------------------------------------------------------------------------------------|----|
| 1  | Receiver Operating Characteristic curve for setting A including a moderate number of risk factors ( $d = 12$ ) . . . . .                                                                                                                                     | 3  |
| 2  | Receiver Operating Characteristic curve for setting B including a moderate number of risk factors ( $d = 12$ ) . . . . .                                                                                                                                     | 3  |
| 3  | Causal effect estimates for setting A including a moderate number of risk factors ( $d = 12$ ) . . . . .                                                                                                                                                     | 4  |
| 4  | Causal effect estimates for setting B including a moderate number of risk factors ( $d = 12$ ) . . . . .                                                                                                                                                     | 5  |
| 5  | Receiver Operating Characteristic curve for setting A including a large number of risk factors ( $d = 92$ ) . . . . .                                                                                                                                        | 6  |
| 6  | Receiver Operating Characteristic curve for setting B including a large number of risk factors ( $d = 92$ ) . . . . .                                                                                                                                        | 6  |
| 7  | Causal effect estimate for setting A including a large number of risk factors ( $d = 92$ ) . . . . .                                                                                                                                                         | 7  |
| 8  | Causal effect estimate for setting B including a large number of risk factors ( $d = 92$ ) . . . . .                                                                                                                                                         | 8  |
| 9  | Genetic correlation between metabolite measurements based on the $n = 148$ instrumental genetic variants. . . . .                                                                                                                                            | 17 |
| 10 | Diagnostic plot of the predicted associations with AMD against the observed associations with AMD . . . . .                                                                                                                                                  | 18 |
| 11 | Scatterplot of association with A) XL.HDL.C B) L.HDL.C on the $x$ -axis against the association with AMD $y$ -axis after excluding the <i>LIPC</i> , <i>FUT2</i> and <i>APOE</i> gene regions. The MACE of each risk factor on AMD is marked in red. . . . . | 18 |
| 12 | Diagnostic plot of the predicted associations with AMD against the observed associations with AMD after excluding the <i>LIPC</i> , <i>FUT2</i> and <i>APOE</i> gene regions . . . . .                                                                       | 19 |
| 13 | Diagnostic plot of the predicted associations with AMD against the observed associations with AMD after excluding the <i>LIPC</i> , <i>FUT2</i> and <i>APOE</i> gene regions . . . . .                                                                       | 20 |

## List of Tables

|   |                                                                                                                           |    |
|---|---------------------------------------------------------------------------------------------------------------------------|----|
| 1 | Ranking of risk factors (top ten) for age-related macular degeneration including the <i>LIPC</i> region . . . . .         | 9  |
| 2 | $q$ -statistic for all genetic variants . . . . .                                                                         | 10 |
| 3 | Cook's distance for all genetic variants . . . . .                                                                        | 11 |
| 4 | Complete ranking of risk factors for age-related macular degeneration excluding outliers and influential points . . . . . | 12 |
| 5 | $q$ -statistic for $n = 145$ genetic variants excluding <i>LIPC</i> , <i>FUT2</i> and <i>APOE</i> . . . . .               | 13 |
| 6 | Cook's distance for $n = 145$ genetic variants excluding <i>LIPC</i> , <i>FUT2</i> and <i>APOE</i> . . . . .              | 14 |

|   |                                              |    |
|---|----------------------------------------------|----|
| 7 | Parameter check: Prior probability . . . . . | 15 |
| 8 | Parameter check: Prior variance . . . . .    | 16 |

# 1 Simulation

## 1.1 Supplementary Figures

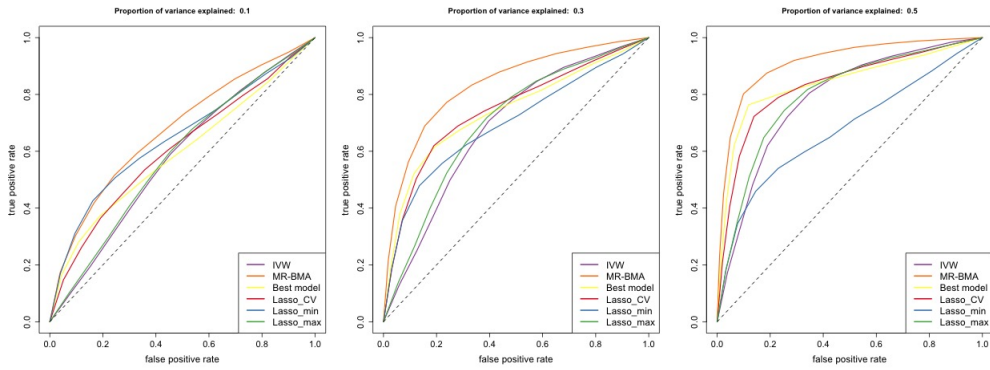

Figure 1: Receiver Operating Characteristic (ROC) curve for setting A including a moderate number of risk factors ( $d = 12$ ) of which 4 are true positive effects. Proportion of variance explained is set to 0.1 (left) 0.3 (middle) and 0.5 (right).

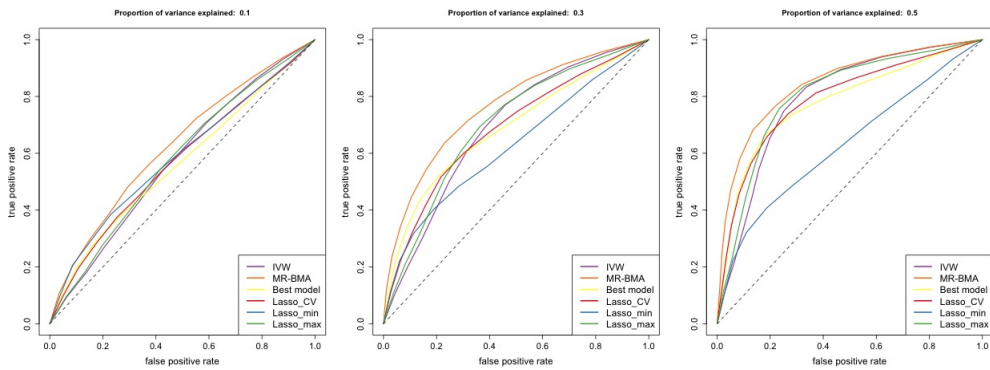

Figure 2: Receiver Operating Characteristic (ROC) curve for setting B including a moderate number of risk factors ( $d = 12$ ) of which 8 are true positive effects. Proportion of variance explained is set to 0.1 (left) 0.3 (middle) and 0.5 (right).

4

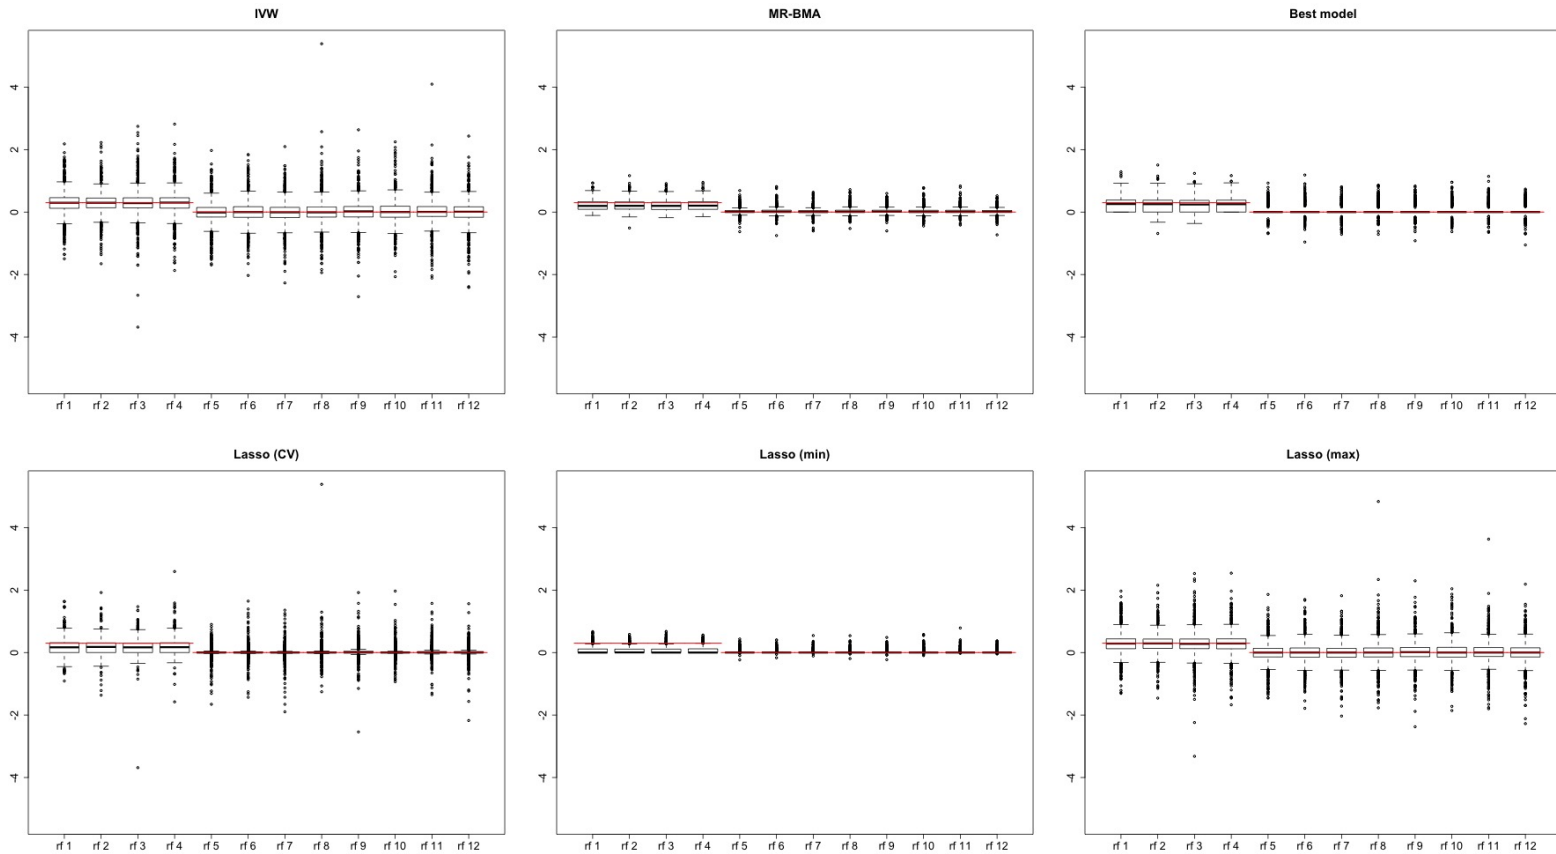

Figure 3: Boxplots of the causal effect estimates for setting A including a moderate number of risk factors ( $d = 12$ ) of which 4 are true positive effects. The true causal effects are marked in red. From top left to bottom right are the competing approaches: IVW, MR-BMA, best model and Lasso with its three implementations (cross-validation, maximum penalty and minimum penalty). Proportion of variance explained is set to 0.3.

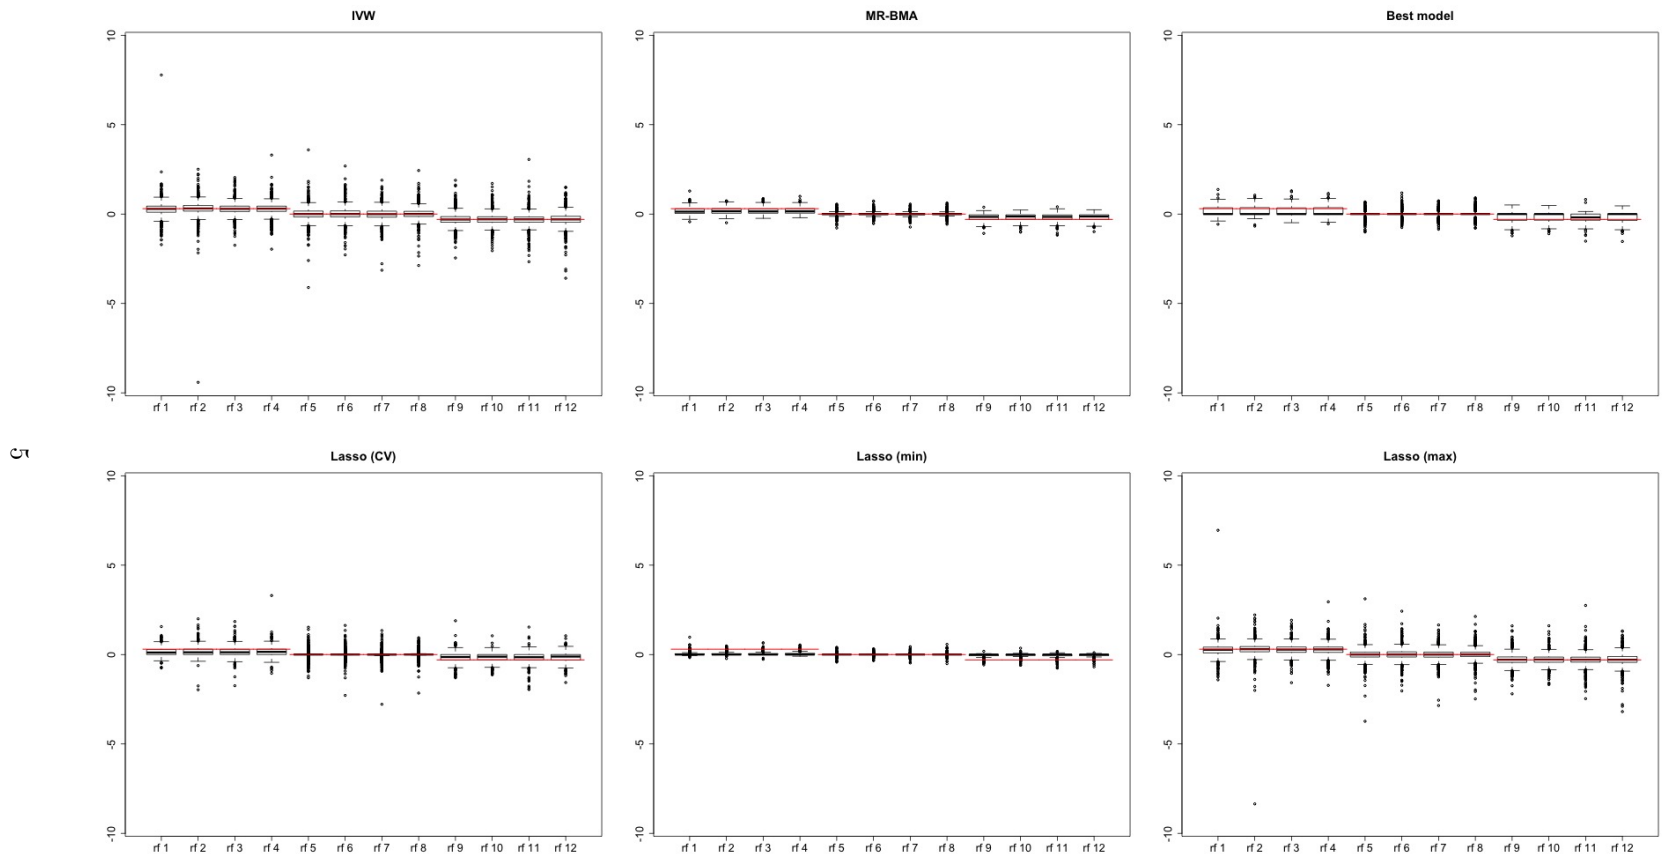

CT

Figure 4: Boxplots of the causal effect estimates for setting B including a moderate number of risk factors ( $d = 12$ ) of which 4 have a positive and 4 have a negative causal effect. The true causal effects are marked in red. From top left to bottom right are the competing approaches: IVW, MR-BMA, best model and Lasso with its three implementations (cross-validation, maximum penalty and minimum penalty). Proportion of variance explained is set to 0.3.

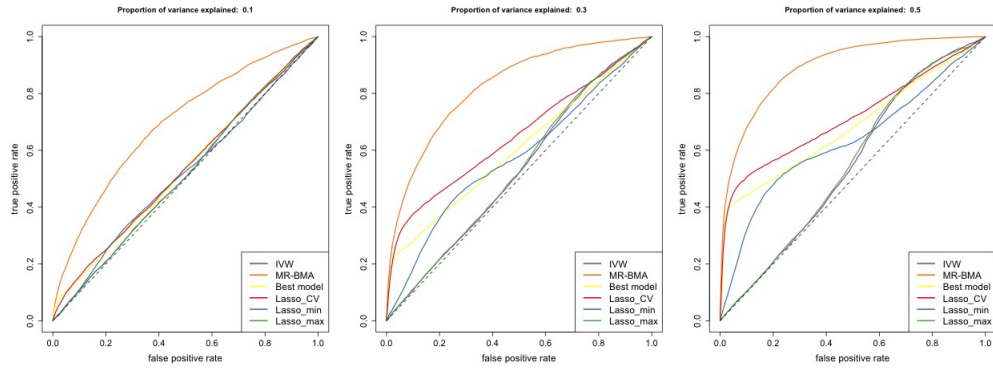

Figure 5: Receiver Operating Characteristic (ROC) curve for setting A including a large number of risk factors ( $d = 92$ ) of which 4 are true positive effects. Proportion of variance explained is set to 0.1 (left) 0.3 (middle) and 0.5 (right).

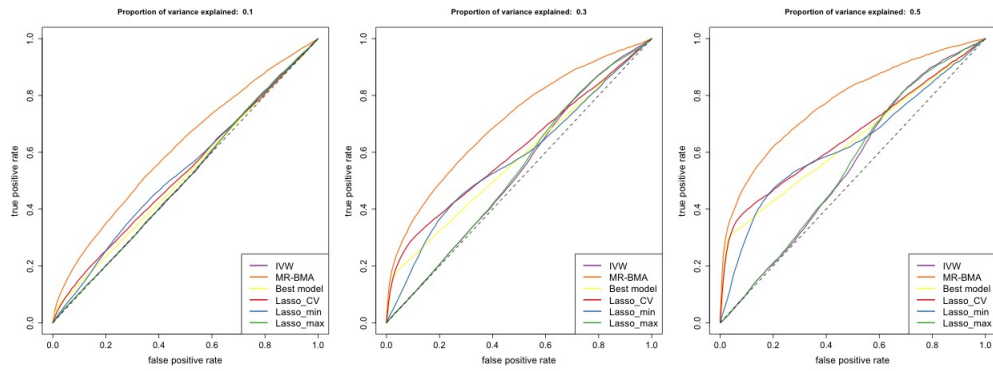

Figure 6: Receiver Operating Characteristic (ROC) curve for setting B including a large number of risk factors ( $d = 92$ ) of which 8 are true positive effects. Proportion of variance explained is set to 0.1 (left) 0.3 (middle) and 0.5 (right).

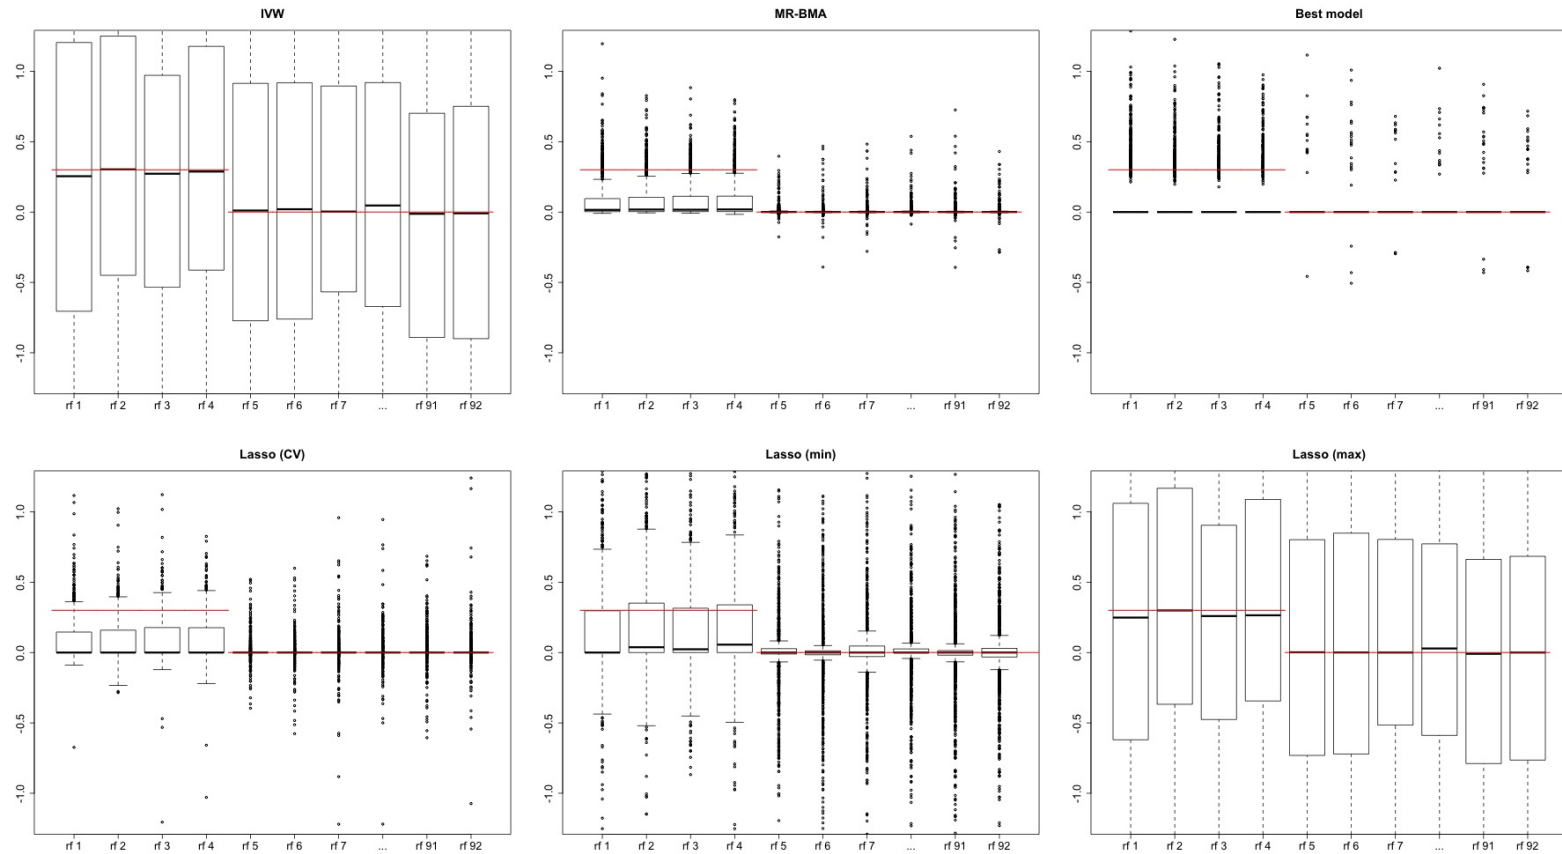

Figure 7: Boxplots of the causal effect estimates for setting A including a large number of risk factors ( $d = 92$ ) of which 4 are true positive effects. Risk factors 8 to 90 are omitted. The true causal effects are marked in red. From top left to bottom right are the competing approaches: IVW, MR-BMA, best model and Lasso with its three implementations (cross-validation, maximum penalty and minimum penalty). Proportion of variance explained is set to 0.3.

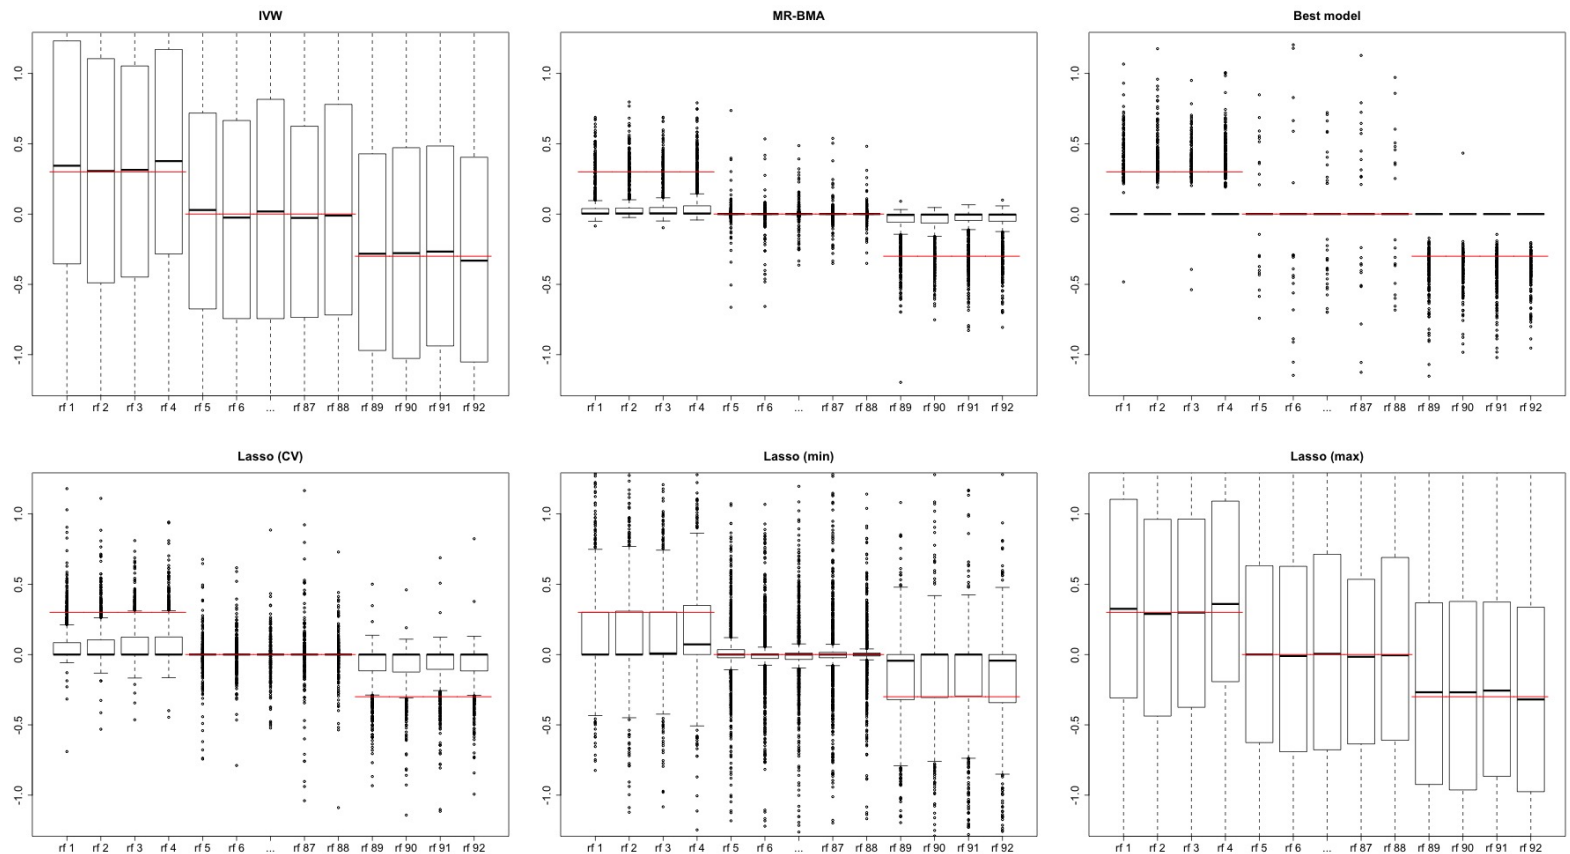

∞

Figure 8: Boxplots of the causal effect estimates for setting B including a large number of risk factors ( $d = 92$ ) of which 4 have a positive and 4 have a negative causal effect. Risk factors 7 to 86 are omitted. The true causal effects are marked in red. From top left to bottom right are the competing approaches: IVW, MR-BMA, best model and Lasso with its three implementations (cross-validation, maximum penalty and minimum penalty). Proportion of variance explained is set to 0.3.



## 2 Application

### 2.1 Supplementary Tables

| A) Model averaging |             |            |                              |
|--------------------|-------------|------------|------------------------------|
|                    | risk factor | <i>MIP</i> | $\hat{\theta}_{\text{MACE}}$ |
| 1                  | LDL.D       | 0.523      | -0.227                       |
| 2                  | XS.VLDL.TG  | 0.243      | -0.125                       |
| 3                  | S.HDL.TG    | 0.237      | -0.103                       |
| 4                  | IDL.TG      | 0.222      | -0.120                       |
| 5                  | Gln         | 0.190      | -0.074                       |
| 6                  | S.VLDL.TG   | 0.172      | -0.070                       |
| 7                  | XXL.VLDL.TG | 0.157      | 0.078                        |
| 8                  | S.LDL.C     | 0.139      | 0.059                        |
| 9                  | Serum.TG    | 0.125      | -0.056                       |
| 10                 | Est.C       | 0.093      | 0.030                        |

---

| B) Individual models |                      |           |                         |
|----------------------|----------------------|-----------|-------------------------|
|                      | risk factor(s)       | <i>PP</i> | $\hat{\theta}_{\gamma}$ |
| 1                    | LDL.D,S.HDL.TG       | 0.026     | -0.376,-0.398           |
| 2                    | LDL.D,S.VLDL.TG      | 0.021     | -0.485,-0.379           |
| 3                    | LDL.D,Serum.TG       | 0.008     | -0.454,-0.365           |
| 4                    | S.HDL.TG             | 0.008     | -0.433                  |
| 5                    | Est.C,IDL.TG         | 0.008     | 0.393,-0.625            |
| 6                    | LDL.D,XS.VLDL.TG     | 0.007     | -0.339,-0.324           |
| 7                    | XS.VLDL.TG           | 0.007     | -0.373                  |
| 8                    | LDL.D,M.VLDL.TG      | 0.006     | -0.545,-0.408           |
| 9                    | Gln,LDL.D,S.HDL.TG   | 0.005     | -0.353,-0.357,-0.437    |
| 10                   | S.HDL.TG,XXL.VLDL.TG | 0.005     | -0.653,0.45             |

Table 1: Ranking of risk factors (top ten) for age-related macular degeneration according to their marginal inclusion probability (*MIP*) A) and the best ten individual model according to their posterior probability (*PP*) B). Calculation is based on all genetic variants  $n = 148$  including the *LIPC* region. Abbreviations: rf=risk factor, *MIP*=marginal inclusion probability, MACE= model-averaged causal effect, *PP*=posterior probability for individual model.

|    | rs        | region     | $q$ M1 | $q$ M2 | min $q$ |
|----|-----------|------------|--------|--------|---------|
| 1  | rs6859    | APOE       | 17.007 | 17.388 | 17.007  |
| 2  | rs492602  | FUT2       | 15.526 | 13.899 | 13.899  |
| 3  | rs174532  | MYRF       | 11.939 | 11.078 | 11.078  |
| 4  | rs6489818 | MAPKAPK5   | 11.226 | 10.857 | 10.857  |
| 5  | rs103294  | AC245884.7 | 8.857  | 9.255  | 8.857   |
| 6  | rs4465830 | ZNF335     | 7.395  | 11.127 | 7.395   |
| 7  | rs3817588 | GCKR       | 7.263  | 8.095  | 7.263   |
| 8  | rs261342  | LIPC       | 7.11   | 8.107  | 7.11    |
| 9  | rs2710642 | EHBP1      | 6.662  | 6.955  | 6.662   |
| 10 | rs903319  | SLC2A2     | 8.06   | 6.567  | 6.567   |
| 11 | rs2587534 | AL160408.6 | 6.498  | 6.063  | 6.063   |
| 12 | rs9491696 | RSPO3      | 6.317  | 5.658  | 5.658   |
| 13 | rs8176720 | ABO        | 5.415  | 4.972  | 4.972   |
| 14 | rs688     | LDLR       | 4.85   | 5.178  | 4.85    |
| 15 | rs1689797 | LINC01344  | 4.638  | 5.325  | 4.638   |
| 16 | rs1781930 | AKR1C8P    | 4.978  | 4.585  | 4.585   |
| 17 | rs2925979 | CMIP       | 4.66   | 4.516  | 4.516   |
| 18 | rs6882076 | TIMD4      | 5.742  | 4.023  | 4.023   |
| 19 | rs7703051 | HMGCR      | 4.581  | 3.988  | 3.988   |
| 20 | rs38855   | MET        | 4.636  | 3.896  | 3.896   |
| 21 | rs702485  | DAGLB      | 4.863  | 3.892  | 3.892   |
| 22 | rs3741414 | INHBC      | 3.873  | 4.434  | 3.873   |
| 23 | rs2602836 | ADH5       | 3.724  | 4.357  | 3.724   |
| 24 | rs4148218 | ABCG8      | 3.967  | 3.592  | 3.592   |
| 25 | rs3822072 | FAM13A     | 3.549  | 3.858  | 3.549   |
| 26 | rs9930333 | FTO        | 3.351  | 3.428  | 3.351   |
| 27 | rs7225700 | THCAT158   | 3.127  | 3.305  | 3.127   |
| 28 | rs6680658 | GALNT2     | 3.124  | 3.675  | 3.124   |
| 29 | rs2328223 | SNX5       | 3.189  | 2.867  | 2.867   |
| 30 | rs1800562 | HFE        | 3.307  | 2.857  | 2.857   |

Table 2:  $q$ -statistic for all  $n = 148$  genetic variants for the best individual model 1 (M1: LDL.D, and S.HDL.TG), and model 2 (M2: LDL.D, and S.VLDL.TG), and the minimum  $q$  of each variant in both models. This table displays the 30 variants with the largest minimum  $q$  and the region they fall in.

|    | rs         | region           | $Cd$ M1 | $Cd$ M2 | min $Cd$ |
|----|------------|------------------|---------|---------|----------|
| 1  | rs261342   | LIPC             | 0.989   | 1.087   | 0.989    |
| 2  | rs4465830  | ZNF335           | 0.188   | 0.108   | 0.108    |
| 3  | rs6859     | APOE             | 0.081   | 0.076   | 0.076    |
| 4  | rs174532   | MYRF             | 0.062   | 0.062   | 0.062    |
| 5  | rs3817588  | GCKR             | 0.058   | 0.085   | 0.058    |
| 6  | rs5880     | CETP             | 0.056   | 0.071   | 0.056    |
| 7  | rs103294   | AC245884.7       | 0.045   | 0.044   | 0.044    |
| 8  | rs686030   | TTC39B           | 0.054   | 0.04    | 0.04     |
| 9  | rs7703051  | HMGCR            | 0.039   | 0.045   | 0.039    |
| 10 | rs1689797  | LINC01344        | 0.037   | 0.031   | 0.031    |
| 11 | rs2710642  | EHBP1            | 0.031   | 0.033   | 0.031    |
| 12 | rs2587534  | AL160408.6       | 0.02    | 0.018   | 0.018    |
| 13 | rs799160   | intergenic       | 0.017   | 0.016   | 0.016    |
| 14 | rs894210   | intergenic       | 0.015   | 0.022   | 0.015    |
| 15 | rs10493326 | DOCK7            | 0.011   | 0.017   | 0.011    |
| 16 | rs515135   | APOB(intergenic) | 0.019   | 0.011   | 0.011    |
| 17 | rs2068888  | CYP26A1          | 0.012   | 0.011   | 0.011    |
| 18 | rs7225700  | THCAT158         | 0.011   | 0.012   | 0.011    |
| 19 | rs1515110  | NR               | 0.014   | 0.01    | 0.01     |
| 20 | rs1800562  | HFE              | 0.01    | 0.012   | 0.01     |
| 21 | rs3741414  | INHBC            | 0.01    | 0.016   | 0.01     |
| 22 | rs10401969 | SUGP1            | 0.009   | 0.025   | 0.009    |
| 23 | rs903319   | SLC2A2           | 0.02    | 0.008   | 0.008    |
| 24 | rs2980885  | AC091114.1       | 0.007   | 0.01    | 0.007    |
| 25 | rs2923084  | AMPD3            | 0.007   | 0.008   | 0.007    |
| 26 | rs3198697  | PDXDC1           | 0.007   | 0.01    | 0.007    |
| 27 | rs2925979  | CMIP             | 0.007   | 0.007   | 0.007    |
| 28 | rs688      | LDLR             | 0.007   | 0.01    | 0.007    |
| 29 | rs6882076  | TIMD4            | 0.006   | 0.016   | 0.006    |
| 30 | rs2326077  | intergenic       | 0.006   | 0.006   | 0.006    |

Table 3: Cook’s distance ( $Cd$ ) based on  $n = 148$  genetic variants including *LIPC* for the best individual model 1 (M1: LDL.D, and S.HDL.TG), and model 2 (M2: LDL.D, and S.VLDL.TG), and the minimum Cook’s distance of each variant in any of the models. This table displays the 30 variants with the largest minimum Cook’s distance and the region they fall in.

|    | risk factor | $MIP$ | $\hat{\theta}_{MACE}$ |
|----|-------------|-------|-----------------------|
| 1  | XL.HDL.C    | 0.677 | 0.332                 |
| 2  | L.HDL.C     | 0.254 | 0.099                 |
| 3  | Gln         | 0.164 | -0.055                |
| 4  | Tyr         | 0.114 | -0.034                |
| 5  | HDL.D       | 0.085 | 0.023                 |
| 6  | XS.VLDL.TG  | 0.079 | -0.018                |
| 7  | Ace         | 0.069 | 0.017                 |
| 8  | LDL.D       | 0.061 | -0.014                |
| 9  | IDL.TG      | 0.061 | -0.011                |
| 10 | S.VLDL.TG   | 0.059 | -0.013                |
| 11 | Serum.TG    | 0.054 | -0.013                |
| 12 | XXL.VLDL.TG | 0.053 | 0.015                 |
| 13 | Serum.C     | 0.047 | -0.009                |
| 14 | HDL.C       | 0.045 | 0.008                 |
| 15 | M.HDL.C     | 0.045 | -0.009                |
| 16 | His         | 0.043 | -0.008                |
| 17 | S.HDL.TG    | 0.043 | -0.006                |
| 18 | S.VLDL.C    | 0.038 | -0.004                |
| 19 | M.VLDL.C    | 0.038 | -0.004                |
| 20 | XL.HDL.TG   | 0.037 | 0.004                 |
| 21 | Val         | 0.034 | 0.006                 |
| 22 | ApoA1       | 0.034 | -0.005                |
| 23 | ApoB        | 0.033 | -0.004                |
| 24 | L.VLDL.C    | 0.032 | -0.004                |
| 25 | M.VLDL.TG   | 0.032 | 0.004                 |
| 26 | Ala         | 0.030 | 0.004                 |
| 27 | Cit         | 0.030 | 0.004                 |
| 28 | XL.VLDL.TG  | 0.029 | -0.003                |
| 29 | L.VLDL.TG   | 0.028 | -0.001                |
| 30 | S.LDL.C     | 0.028 | 0.000                 |
| 31 | LDL.C       | 0.027 | -0.002                |
| 32 | Lac         | 0.026 | 0.003                 |
| 33 | Ile         | 0.025 | 0.001                 |
| 34 | Leu         | 0.024 | 0.001                 |
| 35 | IDL.C       | 0.024 | -0.001                |
| 36 | Urea        | 0.023 | 0.000                 |
| 37 | Glc         | 0.023 | -0.001                |
| 38 | Pyr         | 0.023 | 0.000                 |
| 39 | SM          | 0.023 | -0.002                |
| 40 | Phe         | 0.022 | 0.000                 |
| 41 | Tot.FA      | 0.022 | -0.001                |
| 42 | VLDL.D      | 0.022 | 0.001                 |
| 43 | TotPG       | 0.022 | -0.002                |
| 44 | Alb         | 0.022 | -0.002                |
| 45 | Est.C       | 0.021 | 0.000                 |
| 46 | Gly         | 0.021 | 0.002                 |
| 47 | Glol        | 0.021 | 0.001                 |
| 48 | Crea        | 0.020 | -0.001                |
| 49 | AcAce       | 0.019 | 0.000                 |

Table 4: Ranking of risk factors for age-related macular degeneration according to their marginal inclusion probability ( $MIP$ ) after excluding genetic variants in the *LIPC*, *FUT2* and *APOE* region  $n = 145$ . Abbreviations: rf=risk factor,  $MIP$ =marginal inclusion probability,  $MACE$ = model-averaged causal effect.

|    | rs         | region     | Q M1   | Q M2   | Q M3   | Q M4   | Q M5   | Q M6   | min Q  |
|----|------------|------------|--------|--------|--------|--------|--------|--------|--------|
| 1  | rs103294   | AC245884.7 | 13.03  | 13.155 | 10.253 | 11.936 | 11.203 | 14.449 | 10.253 |
| 2  | rs6489818  | MAPKAPK5   | 11.244 | 9.575  | 7.592  | 10.53  | 10.356 | 9.883  | 7.592  |
| 3  | rs6882076  | TIMD4      | 9.536  | 9.118  | 9.712  | 6.708  | 6.503  | 10.504 | 6.503  |
| 4  | rs2587534  | AL160408.6 | 5.931  | 8.936  | 7.9    | 6.551  | 6.735  | 8.409  | 5.931  |
| 5  | rs903319   | SLC2A2     | 7.514  | 6.651  | 5.481  | 7.275  | 7.255  | 6.379  | 5.481  |
| 6  | rs9491696  | RSPO3      | 5.651  | 5.974  | 7.465  | 5.017  | 4.971  | 5.479  | 4.971  |
| 7  | rs1781930  | AKR1C8P    | 5.176  | 4.259  | 5.251  | 4.996  | 5.072  | 4.851  | 4.259  |
| 8  | rs8176720  | ABO        | 3.929  | 6.312  | 7.846  | 4.592  | 4.734  | 5.197  | 3.929  |
| 9  | rs1689797  | LINC01344  | 6.403  | 4.747  | 3.815  | 4.635  | 4.587  | 5.648  | 3.815  |
| 10 | rs38855    | MET        | 3.768  | 5.98   | 5.388  | 5.082  | 4.973  | 5.205  | 3.768  |
| 11 | rs702485   | DAGLB      | 3.569  | 3.439  | 3.946  | 3.887  | 3.768  | 3.597  | 3.439  |
| 12 | rs3822072  | FAM13A     | 5.105  | 3.376  | 4.495  | 4.504  | 4.606  | 4.099  | 3.376  |
| 13 | rs2710642  | EHBP1      | 3.632  | 3.432  | 4.271  | 4.381  | 4.714  | 3.318  | 3.318  |
| 14 | rs6680658  | GALNT2     | 3.216  | 3.885  | 4.225  | 3.926  | 3.527  | 3.577  | 3.216  |
| 15 | rs9693857  | AC022784.6 | 4.752  | 3.147  | 3.216  | 3.966  | 4.246  | 3.601  | 3.147  |
| 16 | rs2923084  | AMPD3      | 5.067  | 2.814  | 2.805  | 2.956  | 2.944  | 3.933  | 2.805  |
| 17 | rs174532   | MYRF       | 2.708  | 4.701  | 2.946  | 3.405  | 3.927  | 4.12   | 2.708  |
| 18 | rs2925979  | CMIP       | 3.135  | 3.14   | 2.629  | 3.417  | 3.486  | 3.142  | 2.629  |
| 19 | rs499974   | RN7SL786P  | 3.109  | 3.324  | 3.722  | 2.597  | 2.616  | 3.09   | 2.597  |
| 20 | rs688      | LDLR       | 2.562  | 5.557  | 5.382  | 3.97   | 4.071  | 4.856  | 2.562  |
| 21 | rs12145743 | RRNAD1     | 2.78   | 2.413  | 2.793  | 2.711  | 2.541  | 2.587  | 2.413  |
| 22 | rs7264396  | FER1L4     | 2.74   | 3.251  | 3.486  | 2.562  | 2.372  | 3.438  | 2.372  |
| 23 | rs5880     | CETP       | 5.433  | 2.877  | 2.346  | 2.687  | 2.73   | 4.246  | 2.346  |
| 24 | rs1515110  | NR         | 2.213  | 3.003  | 2.272  | 2.999  | 2.733  | 2.575  | 2.213  |
| 25 | rs3761445  | MAFF       | 2.379  | 2.911  | 2.233  | 2.655  | 2.551  | 2.205  | 2.205  |
| 26 | rs9930333  | FTO        | 3.872  | 2.154  | 2.579  | 3.299  | 3.245  | 2.299  | 2.154  |
| 27 | rs17173637 | AOC1       | 2.405  | 2.595  | 3.956  | 2.365  | 2.147  | 3.062  | 2.147  |
| 28 | rs17789218 | intergenic | 3.72   | 2.12   | 2.249  | 3.145  | 3.219  | 3.512  | 2.12   |
| 29 | rs10773105 | SCARB1     | 2.088  | 2.945  | 2.805  | 2.245  | 2.243  | 2.801  | 2.088  |
| 30 | rs7703051  | HMGCR      | 5.974  | 3.24   | 2.076  | 3.246  | 3.319  | 4.009  | 2.076  |

Table 5:  $q$ -statistic for  $n = 145$  genetic variants after excluding *LIPC*, *FUT2* and *APOE* the best individual model 1 (M1: XL.HDL.C), model 2 (M1: L.HDL.C), model 3 (M3: L.HDL.C and Glutamine), model 4 (M4: XL.HDL.C and XS.VLDL.TG), model 5 (M5: IDL.TG and XL.HDL.C), model 6 (M6: HDL.D) and the minimum  $q$ -statistic for in any model. This table displays the 30 variants with the largest minimum  $q$  and the region they fall in.

|    | rs         | region     | <i>Cd</i> M1 | <i>Cd</i> M2 | <i>Cd</i> M3 | <i>Cd</i> M4 | <i>Cd</i> M5 | <i>Cd</i> M6 | min <i>Cd</i> |
|----|------------|------------|--------------|--------------|--------------|--------------|--------------|--------------|---------------|
| 1  | rs5880     | CETP       | 0.234        | 0.277        | 0.12         | 0.122        | 0.122        | 0.297        | 0.12          |
| 2  | rs4465830  | ZNF335     | 0.216        | 0.311        | 0.121        | 0.106        | 0.113        | 0.271        | 0.106         |
| 3  | rs1689797  | LINC01344  | 0.061        | 0.098        | 0.047        | 0.047        | 0.048        | 0.086        | 0.047         |
| 4  | rs686030   | TTC39B     | 0.072        | 0.062        | 0.034        | 0.04         | 0.033        | 0.062        | 0.033         |
| 5  | rs174532   | MYRF       | 0.052        | 0.027        | 0.028        | 0.039        | 0.057        | 0.039        | 0.027         |
| 6  | rs903319   | SLC2A2     | 0.047        | 0.025        | 0.02         | 0.024        | 0.024        | 0.021        | 0.02          |
| 7  | rs1800961  | HNFB4A     | 0.015        | 0.033        | 0.017        | 0.013        | 0.014        | 0.011        | 0.011         |
| 8  | rs9491696  | RSPO3      | 0.016        | 0.013        | 0.026        | 0.01         | 0.011        | 0.02         | 0.01          |
| 9  | rs7897379  | REEP3      | 0.017        | 0.018        | 0.014        | 0.013        | 0.009        | 0.024        | 0.009         |
| 10 | rs499974   | RN7SL786P  | 0.016        | 0.021        | 0.014        | 0.009        | 0.009        | 0.018        | 0.009         |
| 11 | rs103294   | AC245884.7 | 0.028        | 0.026        | 0.066        | 0.023        | 0.039        | 0.009        | 0.009         |
| 12 | rs1515110  | NR         | 0.008        | 0.025        | 0.014        | 0.012        | 0.008        | 0.016        | 0.008         |
| 13 | rs894210   | intergenic | 0.008        | 0.046        | 0.04         | 0.023        | 0.011        | 0.018        | 0.008         |
| 14 | rs10773105 | SCARB1     | 0.015        | 0.042        | 0.021        | 0.009        | 0.008        | 0.04         | 0.008         |
| 15 | rs702485   | DAGLB      | 0.013        | 0.014        | 0.011        | 0.008        | 0.007        | 0.014        | 0.007         |
| 16 | rs17788930 | FNBP4      | 0.014        | 0.014        | 0.007        | 0.011        | 0.01         | 0.014        | 0.007         |
| 17 | rs2602836  | ADH5       | 0.016        | 0.011        | 0.006        | 0.011        | 0.011        | 0.016        | 0.006         |
| 18 | rs4983559  | AL590326.2 | 0.008        | 0.013        | 0.006        | 0.007        | 0.009        | 0.006        | 0.006         |
| 19 | rs11045163 | intergenic | 0.009        | 0.01         | 0.005        | 0.006        | 0.007        | 0.007        | 0.005         |
| 20 | rs2278236  | ANGPTL4    | 0.01         | 0.015        | 0.044        | 0.005        | 0.005        | 0.01         | 0.005         |
| 21 | rs355838   | COBLL1     | 0.013        | 0.007        | 0.004        | 0.009        | 0.008        | 0.008        | 0.004         |
| 22 | rs688      | LDLR       | 0.005        | 0.011        | 0.006        | 0.025        | 0.029        | 0.004        | 0.004         |
| 23 | rs10493326 | DOCK7      | 0.003        | 0.017        | 0.009        | 0.021        | 0.014        | 0.004        | 0.003         |
| 24 | rs6680658  | GALNT2     | 0.003        | 0.011        | 0.007        | 0.007        | 0.003        | 0.008        | 0.003         |
| 25 | rs217386   | NPC1L1     | 0.006        | 0.006        | 0.004        | 0.003        | 0.003        | 0.006        | 0.003         |
| 26 | rs10019888 | C4orf52    | 0.003        | 0.002        | 0.002        | 0.002        | 0.002        | 0.002        | 0.002         |
| 27 | rs205262   | C6orf106   | 0.002        | 0.005        | 0.002        | 0.003        | 0.002        | 0.006        | 0.002         |
| 28 | rs17789218 | intergenic | 0.034        | 0.003        | 0.002        | 0.017        | 0.017        | 0.031        | 0.002         |
| 29 | rs3996352  | intergenic | 0.003        | 0.004        | 0.002        | 0.005        | 0.004        | 0.008        | 0.002         |
| 30 | rs9930333  | FTO        | 0.002        | 0.002        | 0.003        | 0.004        | 0.004        | 0.002        | 0.002         |

Table 6: Cook’s distance (*Cd*) based on  $n = 145$  genetic variants after excluding *LIPC*, *FUT2* and *APOE* the best individual model 1 (M1: XL.HDL.C), model 2 (M1: L.HDL.C), model 3 (M3: L.HDL.C and Glutamine), model 4 (M4: XL.HDL.C and XS.VLDL.TG), model 5 (M5: IDL.TG and XL.HDL.C), model 6 (M6: HDL.D) and the minimum Cook’s distance for in any model. This table displays the 30 variants with the largest minimum Cook’s distance and the region they fall in.

| $p = 0.01$ |             |       |                       |  |
|------------|-------------|-------|-----------------------|--|
| #          | risk factor | $MIP$ | $\hat{\theta}_{MACE}$ |  |
| 1          | XL.HDL.C    | 0.603 | 0.305                 |  |
| 2          | L.HDL.C     | 0.288 | 0.111                 |  |
| 3          | HDL.D       | 0.087 | 0.031                 |  |
| 4          | HDL.C       | 0.024 | 0.008                 |  |
| 5          | Gln         | 0.019 | -0.007                |  |
| 6          | Tyr         | 0.011 | -0.003                |  |
| 7          | XS.VLDL.TG  | 0.010 | -0.002                |  |
| 8          | IDL.TG      | 0.009 | -0.002                |  |
| 9          | Ace         | 0.009 | 0.002                 |  |
| 10         | S.HDL.TG    | 0.009 | -0.002                |  |
| $p = 0.05$ |             |       |                       |  |
| #          | risk factor | $MIP$ | $\hat{\theta}_{MACE}$ |  |
| 1          | XL.HDL.C    | 0.643 | 0.320                 |  |
| 2          | L.HDL.C     | 0.270 | 0.105                 |  |
| 3          | Gln         | 0.089 | -0.030                |  |
| 4          | HDL.D       | 0.084 | 0.027                 |  |
| 5          | Tyr         | 0.055 | -0.016                |  |
| 6          | XS.VLDL.TG  | 0.044 | -0.009                |  |
| 7          | Ace         | 0.038 | 0.010                 |  |
| 8          | IDL.TG      | 0.036 | -0.007                |  |
| 9          | HDL.C       | 0.033 | 0.008                 |  |
| 10         | LDL.D       | 0.031 | -0.007                |  |
| $p = 0.1$  |             |       |                       |  |
| #          | risk factor | $MIP$ | $\hat{\theta}_{MACE}$ |  |
| 1          | XL.HDL.C    | 0.687 | 0.337                 |  |
| 2          | L.HDL.C     | 0.253 | 0.098                 |  |
| 3          | Gln         | 0.153 | -0.051                |  |
| 4          | Tyr         | 0.100 | -0.029                |  |
| 5          | HDL.D       | 0.080 | 0.022                 |  |
| 6          | XS.VLDL.TG  | 0.073 | -0.016                |  |
| 7          | Ace         | 0.066 | 0.017                 |  |
| 8          | IDL.TG      | 0.060 | -0.011                |  |
| 9          | LDL.D       | 0.054 | -0.012                |  |
| 10         | S.VLDL.TG   | 0.053 | -0.012                |  |
| $p = 0.2$  |             |       |                       |  |
| #          | risk factor | $MIP$ | $\hat{\theta}_{MACE}$ |  |
| 1          | XL.HDL.C    | 0.738 | 0.355                 |  |
| 2          | Gln         | 0.267 | -0.089                |  |
| 3          | L.HDL.C     | 0.238 | 0.093                 |  |
| 4          | Tyr         | 0.225 | -0.069                |  |
| 5          | XS.VLDL.TG  | 0.121 | -0.029                |  |
| 6          | XXL.VLDL.TG | 0.116 | 0.041                 |  |
| 7          | Ace         | 0.108 | 0.026                 |  |
| 8          | S.VLDL.TG   | 0.105 | -0.028                |  |
| 9          | Serum.TG    | 0.099 | -0.027                |  |
| 10         | LDL.D       | 0.093 | -0.022                |  |
| $p = 0.3$  |             |       |                       |  |
| #          | risk factor | $MIP$ | $\hat{\theta}_{MACE}$ |  |
| 1          | XL.HDL.C    | 0.758 | 0.357                 |  |
| 2          | Tyr         | 0.374 | -0.122                |  |
| 3          | Gln         | 0.345 | -0.112                |  |
| 4          | XXL.VLDL.TG | 0.263 | 0.110                 |  |
| 5          | L.HDL.C     | 0.238 | 0.095                 |  |
| 6          | Serum.TG    | 0.191 | -0.067                |  |
| 7          | S.VLDL.TG   | 0.173 | -0.053                |  |
| 8          | XS.VLDL.TG  | 0.153 | -0.038                |  |
| 9          | Ace         | 0.135 | 0.031                 |  |
| 10         | LDL.D       | 0.128 | -0.032                |  |

Table 7: Parameter check for the prior probability  $p$ , ranging from  $p = 0.01$  to  $p = 0.3$ . This reflects 0.49 to 14.7 expected causal risk factors. We used  $p = 0.1$  in the main analysis. Abbreviations:  $MIP$ =marginal inclusion probability,  $MACE$ = model-averaged causal effect.

| $\sigma = 0.1$ |             |            |                              |  |
|----------------|-------------|------------|------------------------------|--|
| #              | risk factor | <i>MIP</i> | $\hat{\theta}_{\text{MACE}}$ |  |
| 1              | XL.HDL.C    | 0.498      | 0.126                        |  |
| 2              | L.HDL.C     | 0.454      | 0.106                        |  |
| 3              | HDL.D       | 0.260      | 0.052                        |  |
| 4              | HDL.C       | 0.109      | 0.016                        |  |
| 5              | Gln         | 0.104      | -0.014                       |  |
| 6              | XS.VLDL.TG  | 0.100      | -0.012                       |  |
| 7              | LDL.D       | 0.099      | -0.013                       |  |
| 8              | S.HDL.TG    | 0.098      | -0.013                       |  |
| 9              | S.VLDL.TG   | 0.082      | -0.009                       |  |
| 10             | Tyr         | 0.076      | -0.008                       |  |
| $\sigma = 0.3$ |             |            |                              |  |
| #              | risk factor | <i>MIP</i> | $\hat{\theta}_{\text{MACE}}$ |  |
| 1              | XL.HDL.C    | 0.687      | 0.314                        |  |
| 2              | L.HDL.C     | 0.267      | 0.096                        |  |
| 3              | Gln         | 0.177      | -0.053                       |  |
| 4              | Tyr         | 0.124      | -0.032                       |  |
| 5              | XS.VLDL.TG  | 0.095      | -0.020                       |  |
| 6              | HDL.D       | 0.091      | 0.024                        |  |
| 7              | Ace         | 0.081      | 0.018                        |  |
| 8              | LDL.D       | 0.073      | -0.015                       |  |
| 9              | IDL.TG      | 0.071      | -0.012                       |  |
| 10             | S.VLDL.TG   | 0.066      | -0.013                       |  |
| $\sigma = 0.5$ |             |            |                              |  |
| #              | risk factor | <i>MIP</i> | $\hat{\theta}_{\text{MACE}}$ |  |
| 1              | XL.HDL.C    | 0.687      | 0.338                        |  |
| 2              | L.HDL.C     | 0.251      | 0.097                        |  |
| 3              | Gln         | 0.155      | -0.052                       |  |
| 4              | Tyr         | 0.103      | -0.030                       |  |
| 5              | HDL.D       | 0.082      | 0.022                        |  |
| 6              | XS.VLDL.TG  | 0.076      | -0.017                       |  |
| 7              | Ace         | 0.067      | 0.017                        |  |
| 8              | IDL.TG      | 0.060      | -0.011                       |  |
| 9              | LDL.D       | 0.055      | -0.012                       |  |
| 10             | S.VLDL.TG   | 0.053      | -0.012                       |  |
| $\sigma = 0.7$ |             |            |                              |  |
| #              | risk factor | <i>MIP</i> | $\hat{\theta}_{\text{MACE}}$ |  |
| 1              | XL.HDL.C    | 0.675      | 0.339                        |  |
| 2              | L.HDL.C     | 0.254      | 0.100                        |  |
| 3              | Gln         | 0.131      | -0.045                       |  |
| 4              | Tyr         | 0.089      | -0.027                       |  |
| 5              | HDL.D       | 0.079      | 0.023                        |  |
| 6              | XS.VLDL.TG  | 0.061      | -0.014                       |  |
| 7              | Ace         | 0.055      | 0.014                        |  |
| 8              | IDL.TG      | 0.050      | -0.010                       |  |
| 9              | S.VLDL.TG   | 0.045      | -0.011                       |  |
| 10             | Serum.TG    | 0.043      | -0.011                       |  |

Table 8: Parameter check for the prior variance  $\sigma^2$ , ranging from  $\sigma = 0.1$  to  $\sigma = 0.7$ . We used  $\sigma = 0.5$  in the main analysis. Abbreviations: *MIP*=marginal inclusion probability, MACE= model-averaged causal effect.



## 2.2 Supplementary Figures

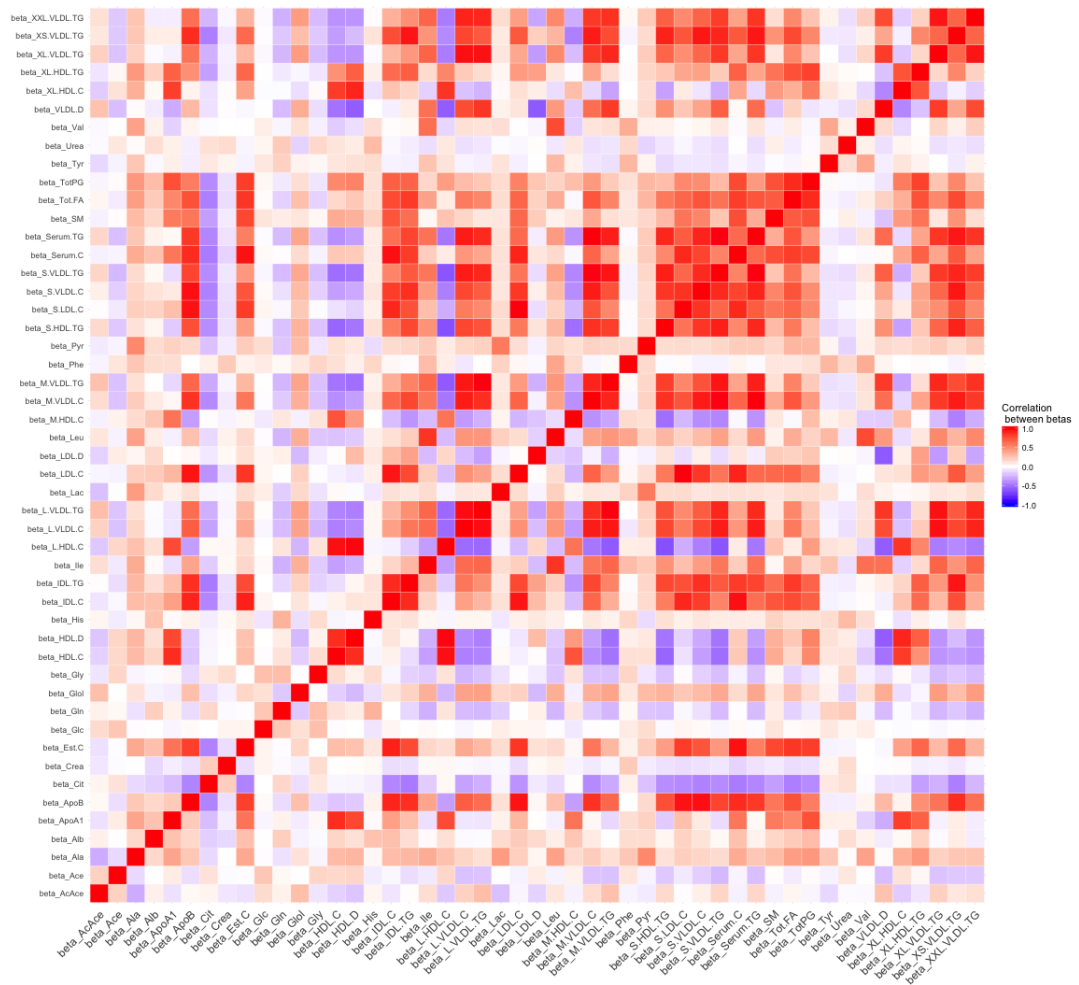

Figure 9: Genetic correlation between metabolite measurements based on the  $n = 148$  instrumental genetic variants.

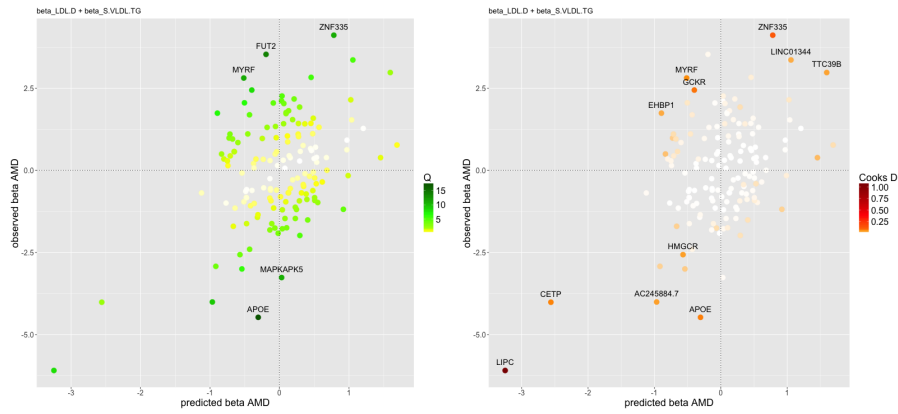

Figure 10: Diagnostic plot of the predicted associations with AMD ( $x$ -axis) based on the for the second best individual model 2 (M2: LDL diameter (LDL.D) and TG in small VLDL (S.VLDL.TG)) against the observed associations with AMD ( $y$ -axis). Model 1 including LDL diameter (LDL.D), and TG content in small HDL (S.HDL.TG) is shown in the main manuscript. The color code shows: left) the  $q$ -statistic for outliers and right) Cook's distance for influential points. Any genetic variant with  $q$ -statistic  $> 10$  or Cook's distance  $> 4/n$  is marked by a label indicating the gene region.

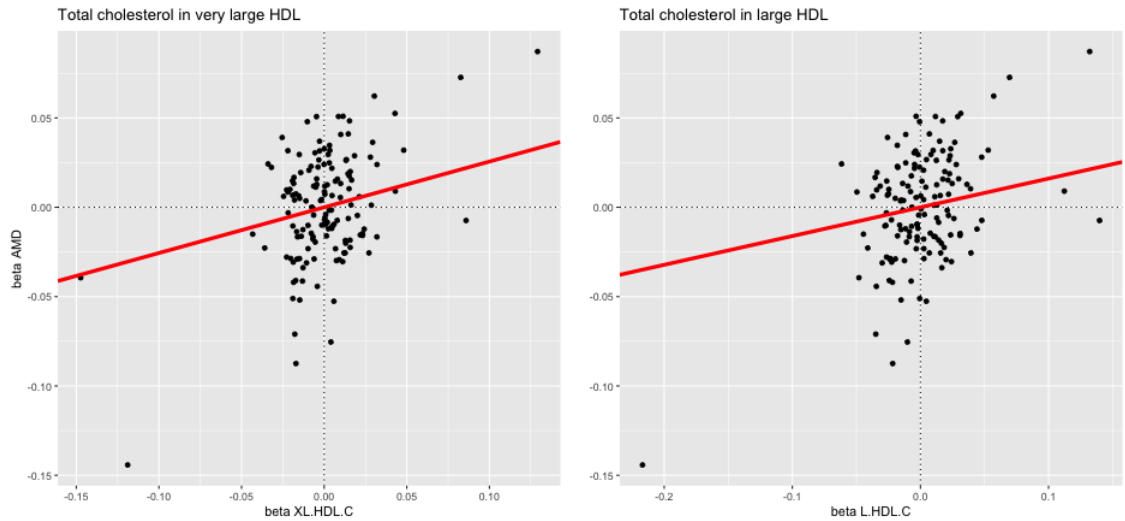

Figure 11: Scatterplot of association with A) XL.HDL.C B) L.HDL.C on the  $x$ -axis against the association with AMD  $y$ -axis after excluding the *LIPC*, *FUT2* and *APOE* gene regions. The MACE of each risk factor on AMD is marked in red.

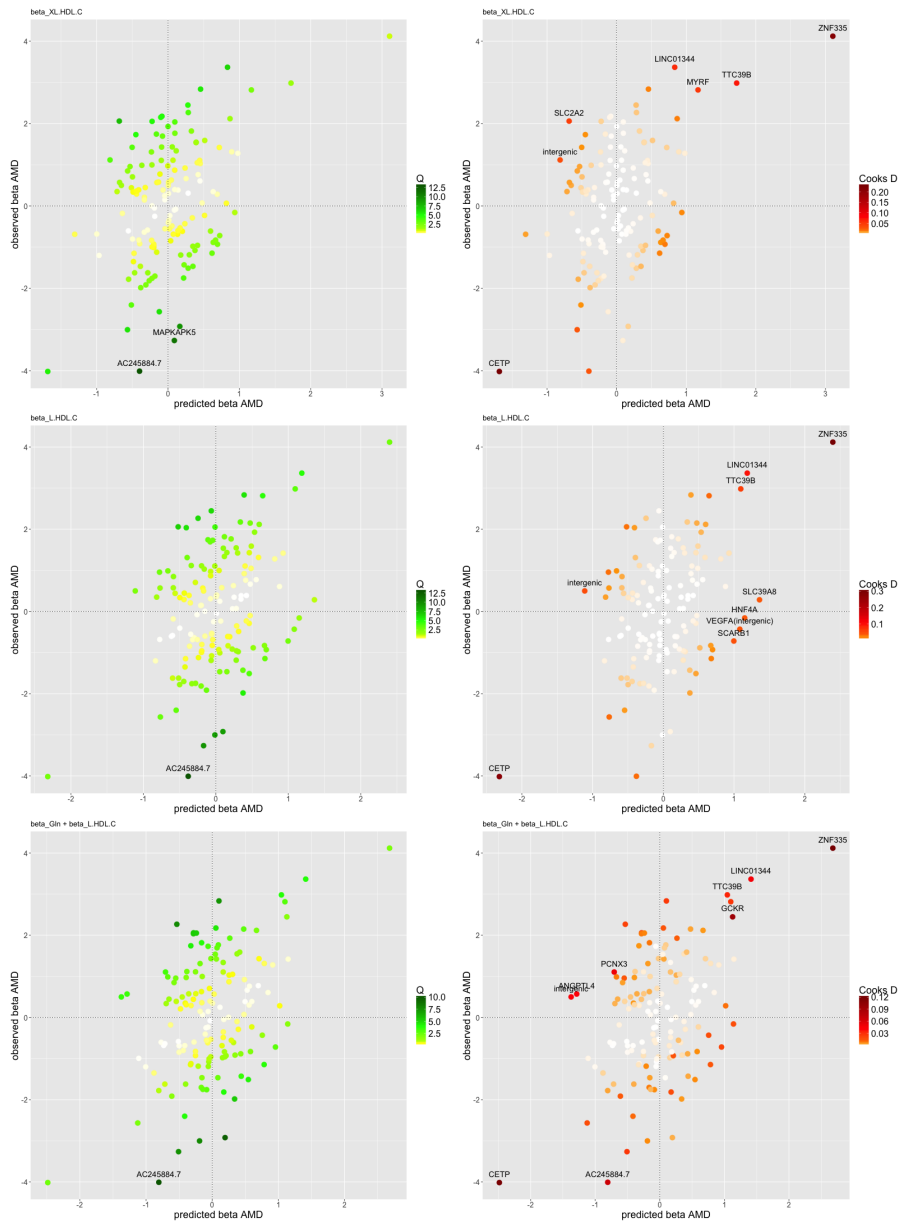

Figure 12: Diagnostic plot of the predicted associations with AMD ( $x$ -axis) based on the best individual model 1 (M1: XL.HDL.C), model 2 (M1: L.HDL.C), model 3 (M3: L.HDL.C and Glutamine), against the observed associations with AMD ( $y$ -axis). The color code shows: left) the  $q$ -statistic for outliers and right) Cook's distance for influential points. Any genetic variant with  $q$ -statistic  $> 10$  or Cook's distance  $> 4/n$  is marked by a label indicating the gene region. The *LIPC*, *FUT2* and *APOE* gene regions have been removed prior to this analysis.

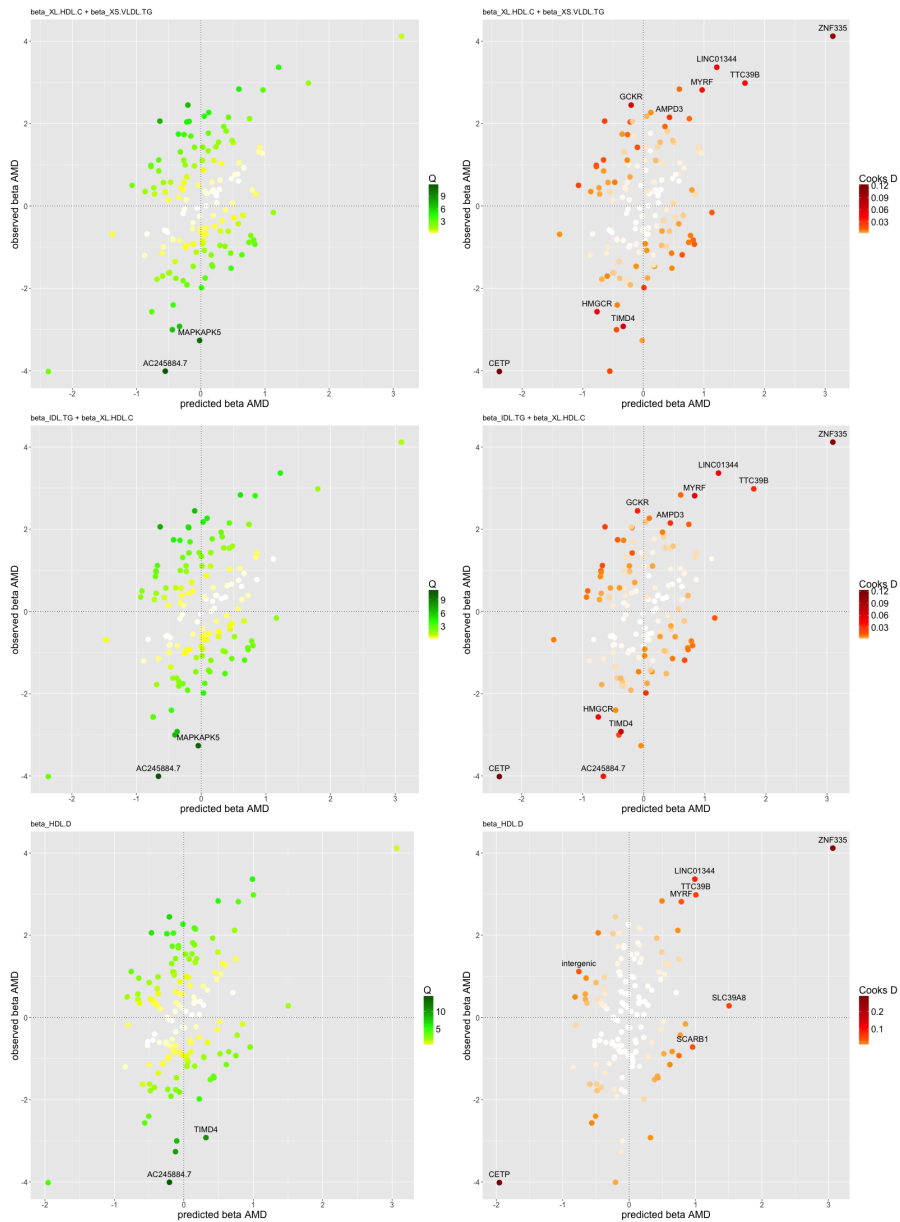

Figure 13: Diagnostic plot of the predicted associations with AMD ( $x$ -axis) based on the best individual model 4 (M4: XL.HDL.C and XS.VLDL.TG), model 5 (M5: IDL.TG and XL.HDL.C), model 6 (M6: HDL.D) against the observed associations with AMD ( $y$ -axis). The color code shows: left) the  $q$ -statistic for outliers and right) Cook's distance for influential points. Any genetic variant with  $q$ -statistic  $> 10$  or Cook's distance  $> 4/n$  is marked by a label indicating the gene region. The *LIPC*, *FUT2* and *APOE* gene regions have been removed prior to this analysis.
